# Supplementary material for: Highly efficient solar driven cogeneration of freshwater and electricity
Source: Royal Society of Chemistry journal article supplement (doi:10.1039/d2ta08590a), 2022-12-21
Supplement: d2ta08590a1.pdf [file d2ta08590a1.pdf]

## SUPPORTING INFORMATION

### Highly efficient solar driven cogeneration of freshwater and electricity

Yunfan Xu<sup>1</sup>, Suwei Dong<sup>1</sup>, Yuhang Sheng<sup>1</sup>, Cihui Liu<sup>1</sup>, Fangjian Xing<sup>1</sup>, Yunsong Di<sup>1</sup>,  
Zhixing Gan<sup>1,2\*</sup>

1. Center for Future Optoelectronic Functional Materials, School of Computer and Electronic Information/School of Artificial Intelligence, Nanjing Normal University, Nanjing 210023, China
2. National Laboratory of Solid State Microstructures, Nanjing University, Nanjing 210093, P. R. China

\*Corresponding author email: zxgan@njnu.edu.cn

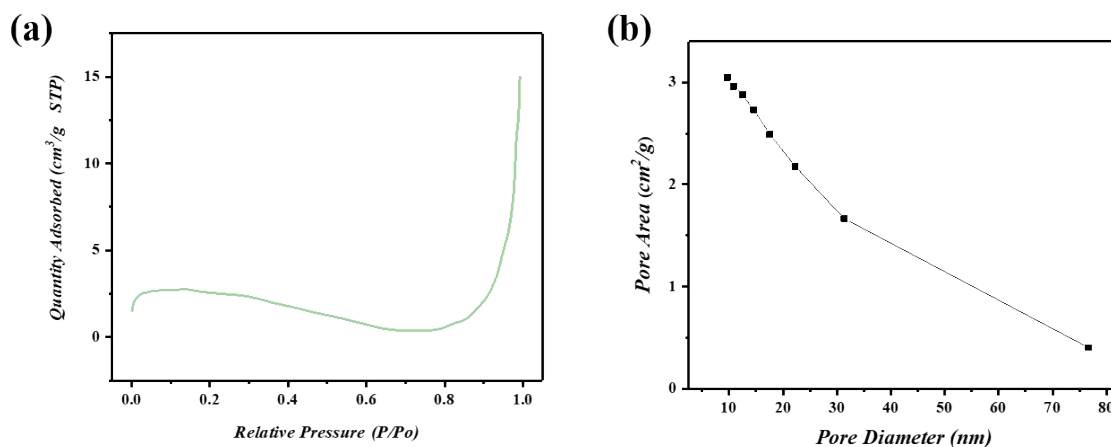

**Fig. S1** (a) N<sub>2</sub> adsorption isotherms of the HGA. (b) Pore area distributions of the HGA calculated by Barrett–Joyner–Hallenda (BJH) method.

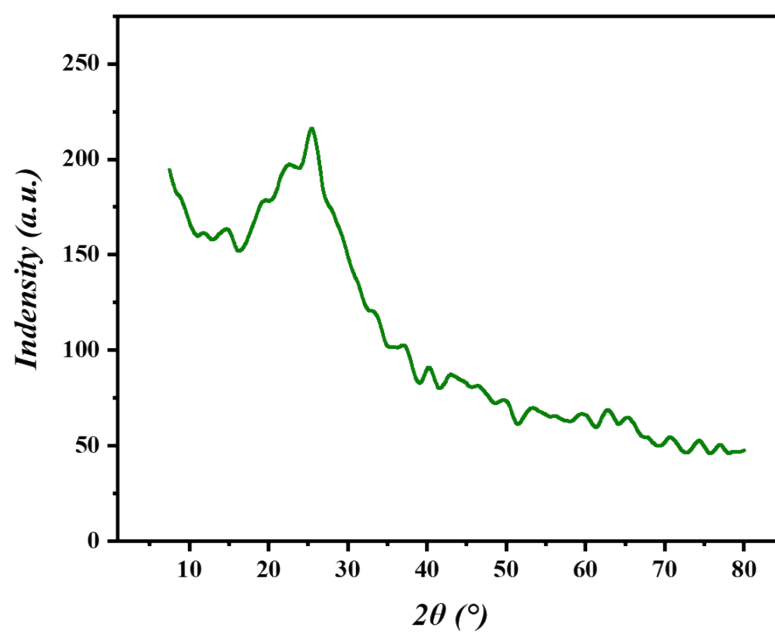

**Fig. S2** XRD pattern of the HGA.

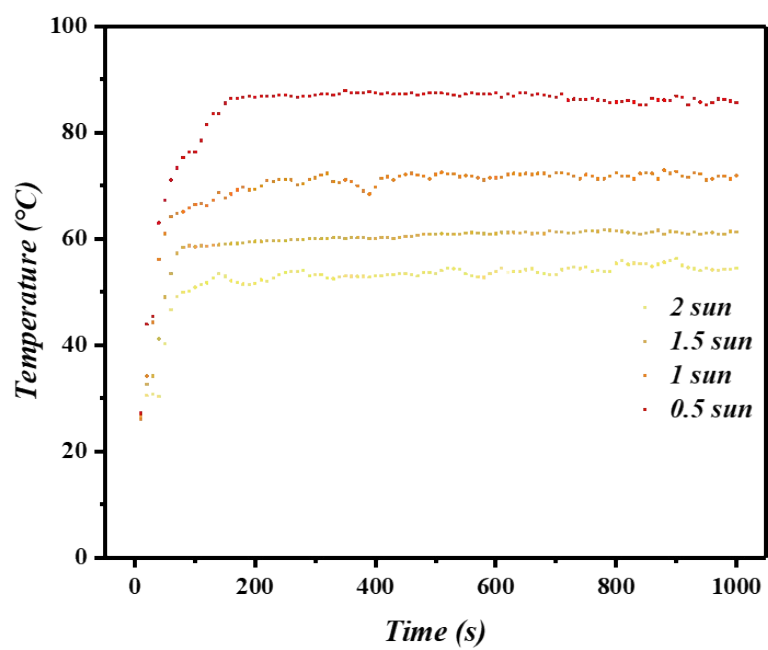

**Fig. S3** Temperature rising curves of the pure GA under different solar irradiations.

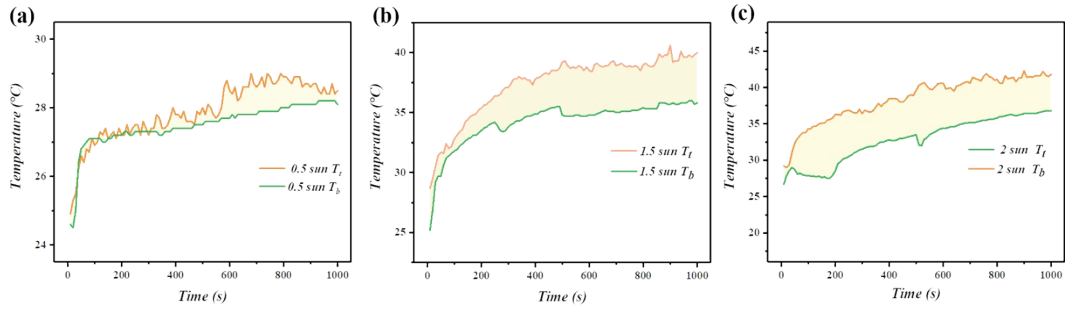

**Fig. S4** Temperatures of the upper and lower surfaces of the GA during SSG under different irradiation intensities.

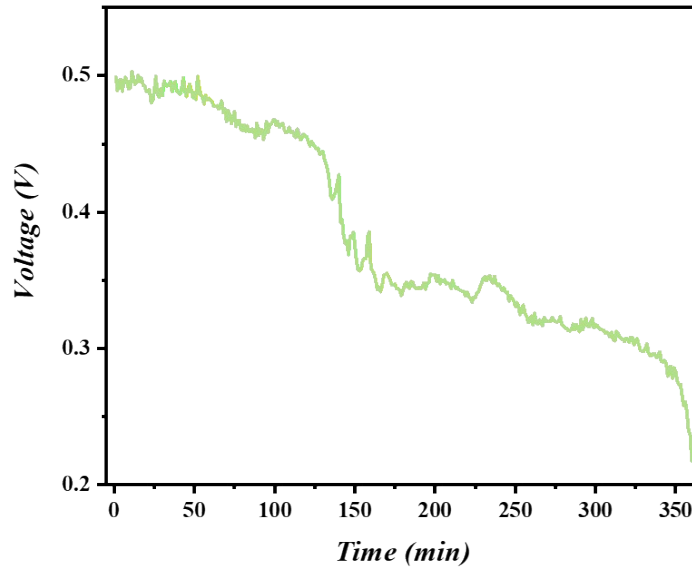

**Fig. S5**  $V_{OC}$  of the HGA in DI water without wind and irradiation. The  $V_{OC}$  gradually decreases from 0.49 V to 0.22 V in 6 h.

### *Evaporation driven electricity*

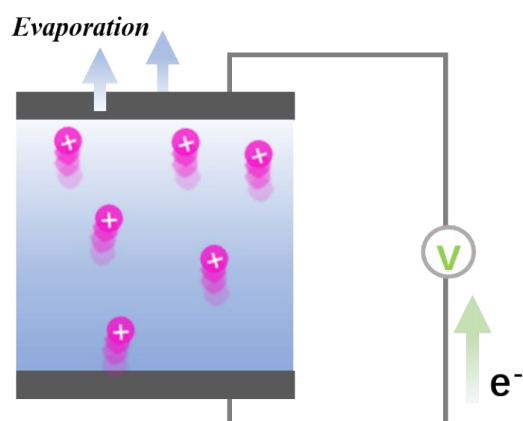

### *Thermodiffusion effect*

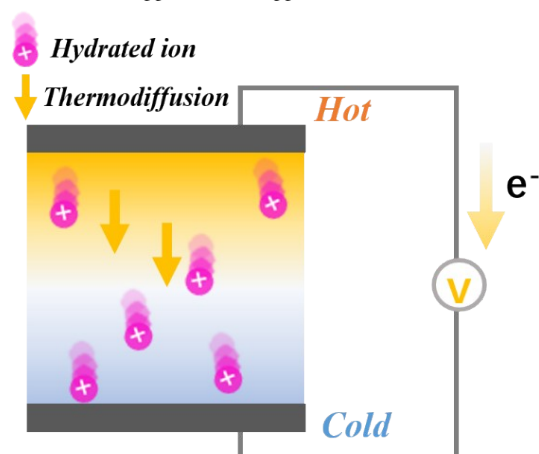

**Fig. S6** Hydrated ions move along the evaporation flow while the thermos-diffusion effect makes the hydrated ions move from the hot to cold electrode.

**Table S1** Voltage, current and output power at different loads

| R (k $\Omega$ ) | U (V) | I (mA) | P (mW) |
|-----------------|-------|--------|--------|
| 0               | 0     | 0.5    | 0      |
| 0.5             | 0.14  | 0.32   | 0.0448 |
| 1               | 0.21  | 0.23   | 0.0483 |
| 1.5             | 0.24  | 0.2    | 0.048  |
| 2               | 0.26  | 0.17   | 0.0442 |
| 2.5             | 0.3   | 0.14   | 0.042  |
| 3               | 0.32  | 0.13   | 0.0416 |
| 3.5             | 0.34  | 0.11   | 0.0374 |
| 4               | 0.37  | 0.1    | 0.037  |
| 4.5             | 0.4   | 0.09   | 0.036  |
| 5               | 0.42  | 0.08   | 0.0336 |

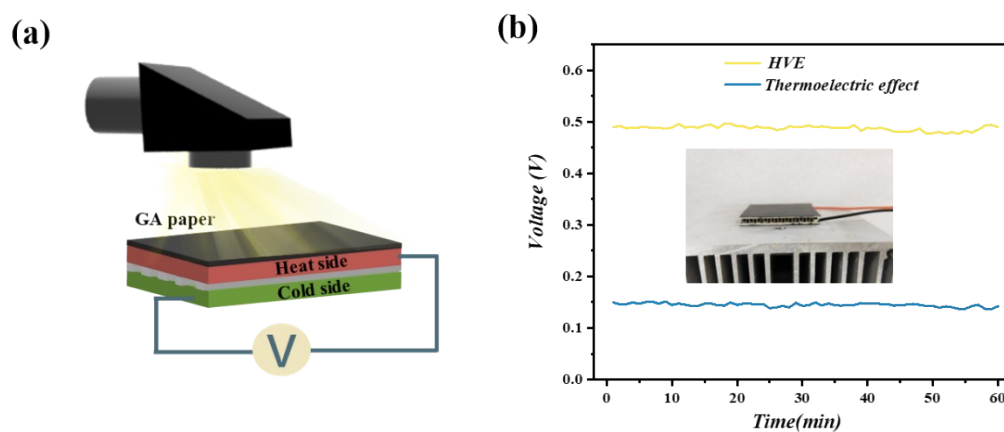

**Fig. S7** (a) Schematic illustration of thermoelectric semiconductor driven by GA paper. (b) Comparison of  $V_{OC}$  generated by thermoelectric effect and HVE under 1 sun irradiation. Inset: Photo of thermoelectric semiconductor.

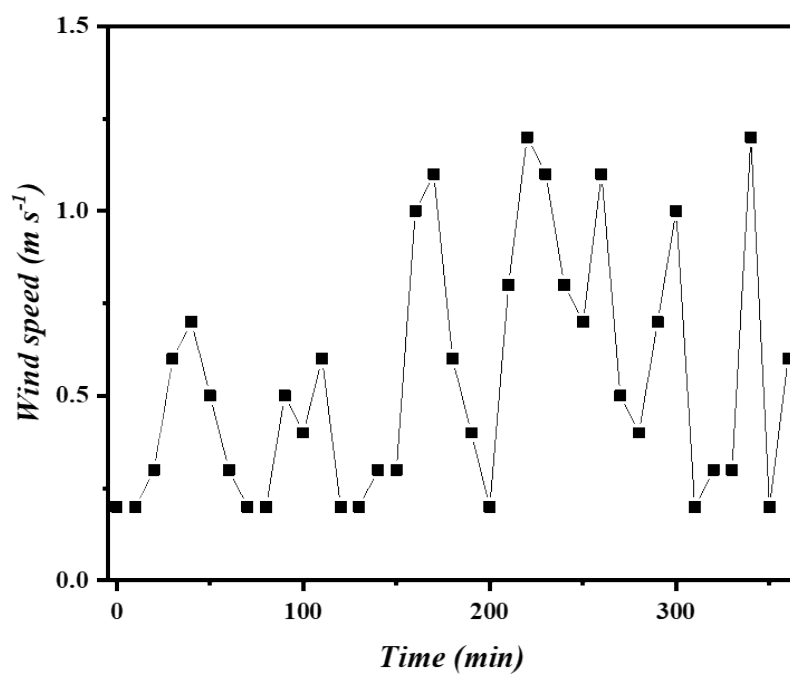

**Fig. S8** The wind speed variation during outdoor experiments.

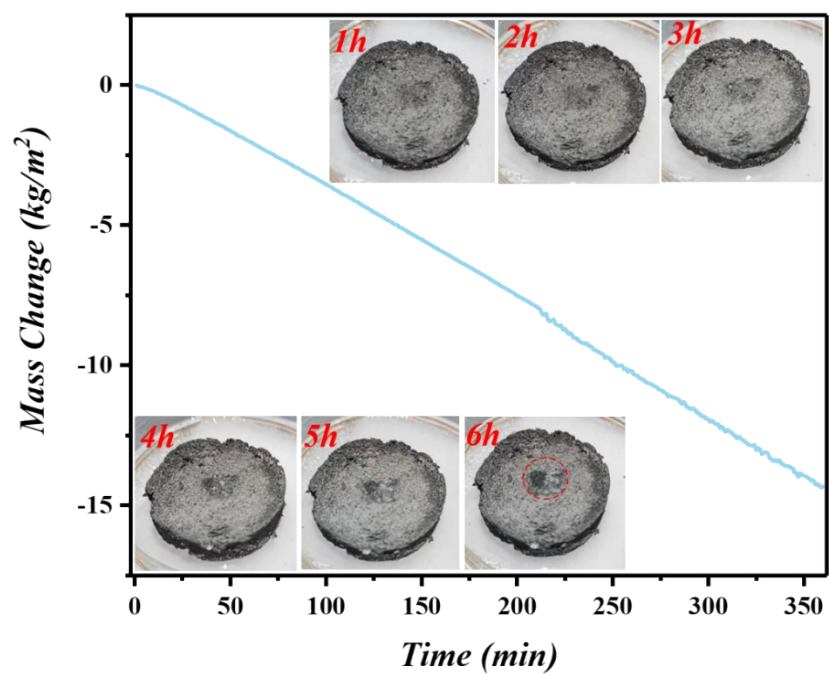

**Fig. S9** Mass change of seawater induced by continuous SSG for 6 h. Inset: Photographs of salt accumulation during the long-term desalination.
